1  
2  
3  
4  
5  
6  
7  
8  
9  
10  
11  
12  
13  
14  
15  
16  
17  
18  
19  
20  
21  
22  
23  
24  
25  
26

## Same Equilibrium. Different Kinetics. Protein Functional Consequences.

Sonja Schmid<sup>\*1,2</sup>, Thorsten Hugel<sup>\*1,3</sup>

*<sup>1</sup>Institute of Physical Chemistry, University of Freiburg, Germany*

*<sup>2</sup>Present address: Department of Bionanoscience, Kavli Institute of Nanoscience Delft,  
Delft University of Technology, The Netherlands*

*<sup>3</sup>Signalling research centers BIOS and CIBSS, Albert Ludwigs University, Freiburg, Germany*

### Abstract

In a living cell, protein function is regulated in several ways, including post-translational modifications (PTMs), protein-protein interaction, or by the global environment (e.g. crowding or phase separation). While site-specific PTMs act very locally on the protein, specific protein interactions typically affect larger (sub-)domains, and global changes affect the whole protein in non-specific ways.

Herein, we directly observe protein regulation in three different degrees of localization, and present the effects on the Hsp90 chaperone system at the levels of conformational equilibria, kinetics and protein function. Interestingly using single-molecule FRET, we find that similar functional and conformational steady-states are caused by completely different underlying kinetics. Solving the complete kinetic rate model allows us to disentangle specific and non-specific effects controlling Hsp90's ATPase function, which has remained a puzzle up to this day. Lastly, we introduce a new mechanistic concept: functional stimulation through conformational confinement. Our results highlight how cellular protein regulation works by fine-tuning the conformational state space of proteins.

## 27 **Significance**

28 **Proteins are perceived more and more as dynamic systems whose function depends criti-**  
29 **cally on local and global flexibility. While 3D structures of proteins are frequently available**  
30 **today, our models often lack the time component, namely rate constants that determine**  
31 **protein function and regulation.**

32 **Here we used single-molecule FRET to elucidate how the chaperone protein Hsp90 is regu-**  
33 **lated on various levels, locally and globally. We find that ATPase stimulation occurs not on-**  
34 **ly through specific interactions, but also non-specifically by reducing non-productive con-**  
35 **formational flexibility; i.e. by changing kinetics rather than thermodynamics. Our work in-**  
36 **troduces ‘stimulation through conformational confinement’ as a general mechanistic con-**  
37 **cept. We anticipate that this concept plays an important role in protein regulation, phase**  
38 **separation, and in dynamic protein systems in general.**

39

40

41

42

43

## 44 **Maintext**

45 Protein function is essential for life as we know it. It is largely encoded in a protein’s amino-acid  
46 chain that dictates not only the specific 3D structure, but also the conformational flexibility and dy-  
47 namics of a protein in a given environment. Precise regulation of protein function is vital for every  
48 living cell to cope with an ever-changing environment, and occurs on many levels pre- and post-  
49 translationally (1,2). After translation by the ribosome, protein function depends strongly on post-  
50 translational modifications (PTMs) (3), but also on binding of nucleotides (4), cofactors (5), various  
51 protein-protein interactions (PPIs) (6), and global effects, such as temperature (7), macro-  
52 molecular crowding and phase separation (8), redox conditions (9), osmolarity (10) etc. Important-  
53 ly, this regulation occurs on very diverse levels of localization. Global effects affect the whole pro-  
54 tein non-specifically, PPIs act at a given interface and site-specific modifications are very localized.  
55 Nevertheless, all of them influence the molecular properties that determine the 3D conformation,

56 the conformational dynamics, and thereby also the function of a protein (11-15). The chaperone  
57 protein Hsp90 (16) is an excellent test system to investigate diverse regulation mechanisms (17). It  
58 was recently discussed that a single PTM can functionally mimic a specific co-chaperone interac-  
59 tion in human Hsp90 (18). Here we take a next step and disentangle how a PTM-related point mu-  
60 tation, a co-chaperone interaction, and macro-molecular crowding affect the function, kinetics, and  
61 thermodynamics of this multi-domain protein.

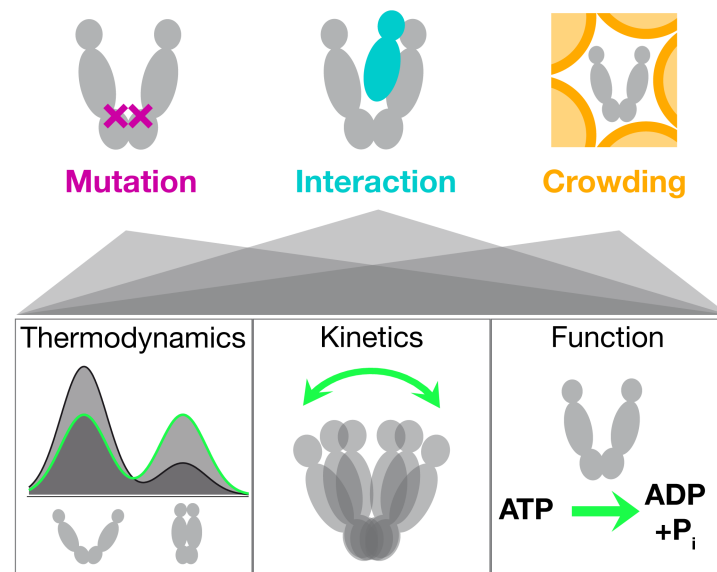

**Fig. 1: Protein regulation uses different degrees of localization.** Mutations or PTMs act most locally, protein-protein interactions (PPIs) act on the protein domain level, and changes in the global environment, such as crowding or phase separation, act non-specifically and globally on the protein. Each of them affect conformational thermodynamics and kinetics to fine-tune the protein conformational state space and thereby protein function.

62

63 Hsp90 is an important metabolic hub. Assisted by about twenty known cochaperones, yeast Hsp90  
64 is involved in the maturation of 20% of the entire proteome (19). Among its substrates (referred to  
65 as 'clients') are many kinases involved in signal transduction, hormone receptors, the guardian of  
66 the genome p53 (20), but also cytoskeletal proteins, e.g. actin, tubulin, and many more (21,22).  
67 Cancer cells were found to be 'addicted' to Hsp90 (23), which is therefor also a prominent drug  
68 target in cancer research. Hsp90 is a homo-dimer where each monomer consists of three domains  
69 (24): the N-terminal domain (N) with a slow ATPase function, the middle domain (M) believed to be  
70 the primary client interaction site (25), and the C-terminal domain providing the main dimerization  
71 contacts. Apart from closed conformations, where the three domains align in parallel, Hsp90 exists

72 primarily in v-shaped, open conformations with dissociated N-terminal and middle domains (26,27).  
73 Both global arrangements are semi-stable at room temperature. As a consequence, Hsp90 alter-  
74 nates constantly between open and closed conformations - even in the absence of the chemical  
75 energy source, ATP (28-30). Surprisingly, the characteristic conformational changes of Hsp90 are  
76 only little affected by e.g. anti-cancer drug candidates (31) or natural nucleotides (29). In addition,  
77 to the stress-induced isoform discussed herein (Hsp82), there is also a cognate isoform (Hsc82) in  
78 yeast, which differs in unfolding stability, client range etc. despite 97% sequence identity (32).

79

80 Here we present three orthogonal ways to modulate Hsp90's conformational state space, illustrat-  
81 ed in **Fig. 1**. The investigated point mutation A577I is located in the C-terminal hinge region of  
82 Hsp90. Residue A577 is the equivalent of a post-translational S-nitrosylation site in human Hsp90  
83 (33). While nitrosylation of that residue has a two-fold inhibitory effect – on the ATPase function  
84 and the client stimulation by human Hsp90 – the A577I mutation caused a nearly 4-fold amplifica-  
85 tion of the ATPase rate (34). The fact that the point mutation is located far away from the ATP  
86 binding site indicates a long-range communication from the C-domain all the way to the N-terminal  
87 ATPase site, offering valuable, mechanistic insight in Hsp90's intra-molecular plasticity. Second,  
88 we consider the protein-protein interactions between Hsp90 and the activating co-chaperone Aha1,  
89 which is a well-known stimulator of Hsp90's inherently slow ATPase activity. It makes contacts to  
90 the middle and N-terminal domain, which rearranges the ATP lid (35), and the catalytic loop (in-  
91 cluding Arg380) (36) in a favorable way for ATP hydrolysis. The affinity of Aha1 for Hsp90 itself is  
92 also markedly enhanced by PTMs (37). The third way of modulation mimics the crowding encoun-  
93 tered in the cell, which is full of proteins, nucleic acids, vesicles and organelles. We mimic cellular  
94 macro-molecular crowding using the common crowding agent Ficoll400, i.e. branched polymeric  
95 sucrose. In contrast to the previous two modulations, crowding represents a completely non-  
96 specific, physical interference.

97 At first sight, all three modulations provoke a similar steady-state behavior in Hsp90. But our sin-  
98 gular-molecule experiments allow us to disentangle the different underlying causes thereof.

99

100

## 101 **Results**

### 102 **Mutation, cochaperone and crowding show similar thermodynamics**

103 First we follow yeast Hsp90's conformational kinetics in real-time using single-molecule Förster  
104 resonance energy transfer (smFRET) measured on a total-internal reflection fluorescence (TIRF)  
105 microscope (**Fig. 2a**). The FRET pair configuration displayed in **Fig. 2a** (top) results in low FRET  
106 efficiency (little acceptor fluorescence) for v-shaped, open conformations of Hsp90, and high FRET  
107 efficiency (intense acceptor fluorescence) for more compact, closed conformations. This allows us  
108 to obtain steady-state information, like the population of closed conformation, and also the kinetics  
109 of conformational changes (29,38-40). Example traces obtained from three Hsp90 molecules un-  
110 der different conditions are displayed in **Fig. 2b**: for the point mutant A577I, in the presence of the  
111 cochaperon Aha1, or under macro-molecular crowding by Ficoll400. The observed transitions be-  
112 tween the low- and high-FRET states reflect global opening or closing. **Fig. 2c** shows the steady-  
113 state population of open and closed conformations. In all three cases, a shift towards closed con-  
114 formations is observed with respect to the corresponding reference distribution obtained under  
115 equivalent experimental conditions (see Methods for details).

116 The A577I mutation increased the closed population from 16% to 47%. This is a large change con-  
117 sidering that this hydrophobic-to-hydrophobic mutation is not a drastic change to the overall charge  
118 distribution. In particular, as the slightly bulkier isoleucine side chain points outward in the crystal  
119 structure of Hsp90's closed conformation (24). In addition to the A577I homodimer, already the  
120 A577I/wild type (wt) hetero-dimer shows a considerably larger population of closed conformations,  
121 especially in the presence of ATP (**Fig. S1** left). Under ADP conditions the additive effect is also  
122 observed, but weaker (**Fig. S1** right). Under both conditions, the second A577I in the homodimer  
123 leads to a further shift towards closed conformations. The slight but consistent shift of the corre-  
124 sponding low-FRET peak in **Fig. 2c** (left) could be explained by a sterical hindrance of the farthest  
125 opening in the A577I homodimer. Furthermore, very fast transitions at the temporal resolution limit  
126 (200ms) occurred more frequently, which can be seen by the increased overlap between the two  
127 populations. Both, sterical hindrance and faster transitions, can be interpreted as a global stiffening  
128 of Hsp90's structural core formed by the C- and middle domain. The interaction with Aha1 (**Fig. 2c**,  
129 center) forms inter-domain (N-M) and inter-monomer contacts. The latter increase the affinity for N-

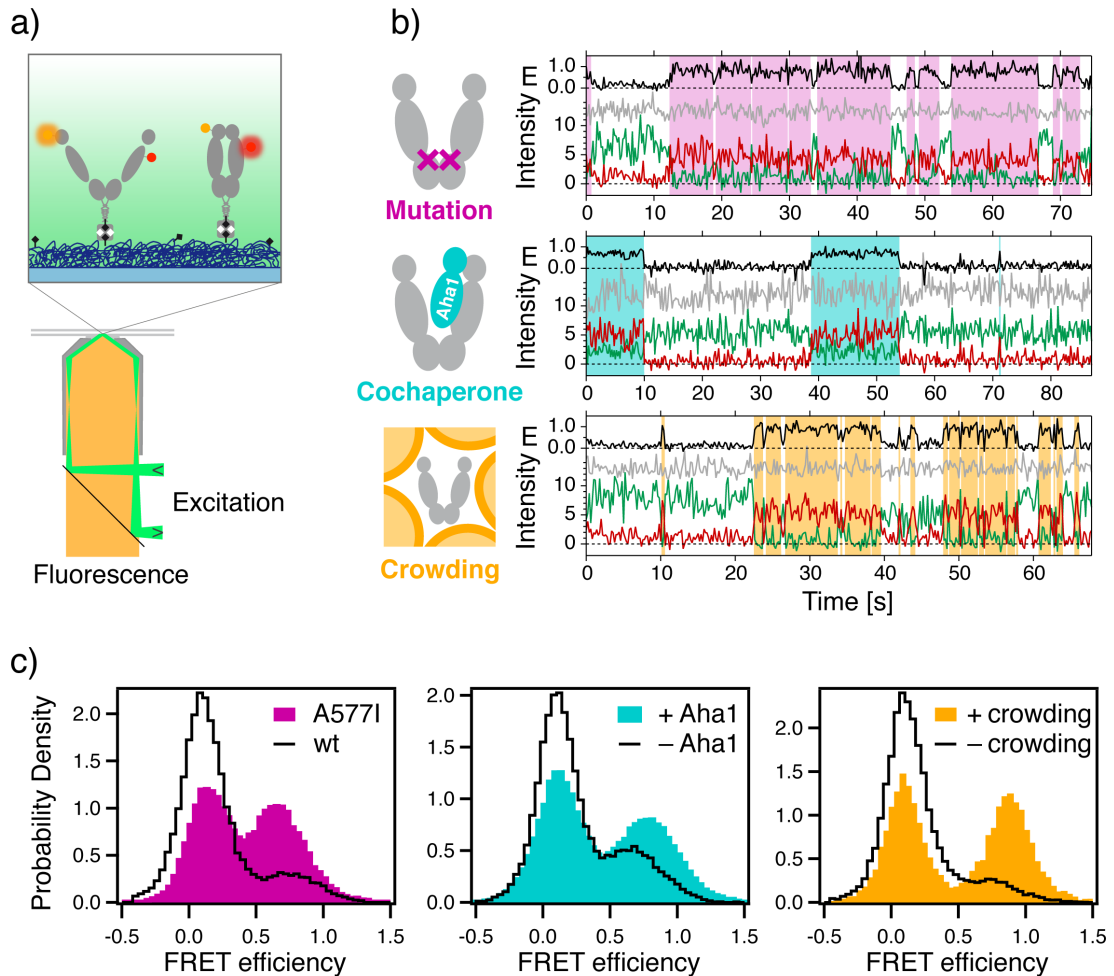

**Fig. 2: Mutation, cochaperone interaction, and crowding show similar thermodynamic effects.** (a) Illustration of the single-molecule FRET experiment using an objective-type TIRF microscope (bottom): cross section through the objective, and flow chamber (both gray) and the dichroic mirror (black) separating the laser excitation (green) from the collected fluorescence (yellow). The zoom view (top) shows the fluorescently labeled Hsp90 (FRET donor, orange; acceptor red), which is immobilized on a PEG-passivated (dark blue) coverslip (light blue) using biotin-neutravidin coupling (black and gray). (b) Example time traces obtained from individual Hsp90 molecules for the point mutant A577I (top), in the presence of 3.5 μM cochaperone Aha1 (center), or under macro-molecular crowding by 20 wt% Ficoll400: FRET efficiency  $E$  (black), fluorescence of the FRET donor (green), acceptor (red), directly excited acceptor (gray). White and colored overlays denote low- and high-FRET dwells, respectively, as obtained using a hidden Markov model and the Viterbi algorithm. (c) FRET histograms compiled from many single-molecule trajectories as indicated, and normalized to unity (wt: wild type). Reference data (black) was measured under the specific conditions of each of the three experiment series (see Methods). The number of individual molecules included per histogram are: A577I, 181; wt, 163; +Aha1, 122; -Aha1, 231; +crowding, 50; -crowding, 81.

130 N binding, and thus cause Hsp90 to shift from 29% closed to 46% closed population, which is in  
 131 line with previous qualitative reports (41,42). Lastly, macro-molecular crowding increased the  
 132 closed population from 14% to 52%, in agreement with previous ensemble findings (43). In con-

133 trast, to the A577I mutant, crowding slowed down fast fluctuation at the resolution limit, which cre-  
134 ates well-separated populations in **Fig. 2c**). The induced shift towards closed conformations ap-  
135 pears in a concentration-dependent manner, as can be seen in **Fig. S2**. In contrast to polymeric,  
136 branched sucrose (Ficoll400), monomeric sucrose had only negligible effect on the population dis-  
137 tribution. This proves that macro-molecular crowding is the cause of the observed population shift,  
138 and a biochemical glucose-associated reason can be dismissed.

139

140 In all three cases, a clear shift towards closed conformations is observed, although to slightly dif-  
141 ferent extents. Importantly, based on these distributions alone, the *energetic* origin of the popula-  
142 tion shift remains unclear. I.e. whether the observations arise from a stabilization of closed confor-  
143 mations, or a destabilization of the open conformations, or even a combination of both. To answer  
144 these questions, we solved the full kinetic rate model, presented below.

145

146

#### 147 **Same thermodynamics, different conformational kinetics**

148 **Fig. 3a** shows the kinetic rate models describing Hsp90's global opening and closing dynamics.  
149 The significant changes caused by each type of modulation are highlighted in red and green as  
150 indicated. The corresponding quantitative rate changes and confidence intervals are displayed in  
151 **Fig. 3b**. We used the Single-Molecule Analysis of Complex Kinetic Sequences (SMACKS (29)) to  
152 quantify rate constants and uncertainties directly from the smFRET raw data. For Hsp90's global  
153 conformational changes, we consistently infer 4-state models (29,31,44): two low-FRET states  
154 (open conformations) and two high-FRET states (closed conformations). Although only two differ-  
155 ent FRET efficiencies can be resolved, at least four kinetic states are needed to describe the ob-  
156 served kinetic heterogeneity. Based on recent results (27), we expect an entire ensemble of open  
157 sub-conformations that - on the timescale of the experiment - are sufficiently well described by two  
158 kinetically different low-FRET states. The two closed states, one short-lived (state 2) and one  
159 longer-lived (state 3), likely differ in local conformational elements. The well-known N-terminal be-  
160 ta-sheet with or without its cross-monomer contacts (as observed in the closed crystal structure  
161 (24)) could explain the additional stabilization of state 3 with respect to state 2.

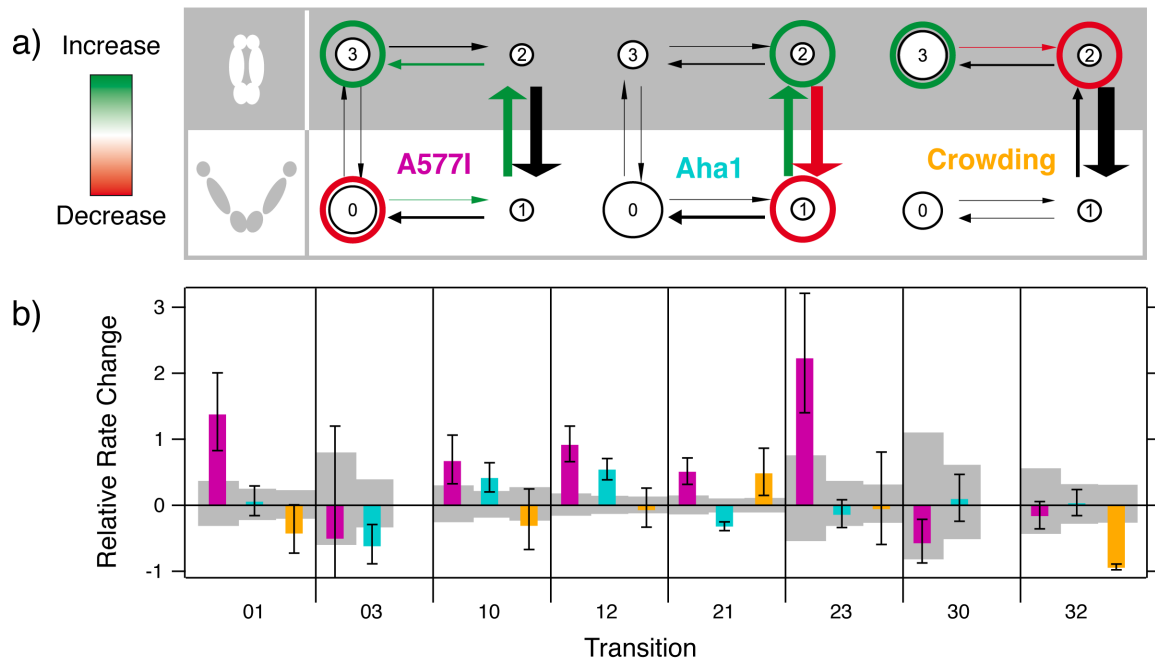

**Fig. 3: Different conformational kinetics cause similar thermodynamics.** (a) Kinetic rate models observed for the point mutant A577I, the cochaperone Aha1, the macro-molecular crowding agent Ficoll400 - each compared to the reference data: wild-type, no Aha1, no crowding, respectively. Significant differences to the reference are highlighted in red and green. Conformational kinetics are described by four states: states 0,1 represent open conformations, and 2,3 are closed conformations. Large and small arrows and circles indicate the size of rates and populations, respectively. For crowding, only 6 links are found, as discussed previously for experiments in the absence of ATP (29,44). (b) The relative rate change under the three conditions in (a) with respect to the reference. Gray boxes show the 95% confidence interval of the reference data. Transition names and color code as in (a). All values are listed in **Table S1**. The molecule counts are the same as for **Fig. 2**.

162 In the case of cochaperon Aha1, the shift in the FRET efficiency histogram originates from oppos-  
 163 ing changes of the fast rates between states 1 and 2 (**Fig. S3**). This is in contrast to the effect of  
 164 the C-terminal point mutation A577I, which collectively accelerates the 3-step pathway out of state  
 165 0 to state 3. Note that a kinetic model with only three links - similar to the model for crowding in  
 166 **Fig. 3a** right - is statistically sufficient (according to likelihood ratio testing detailed in Ref (29) SI  
 167 point 1.2) to describe the observed kinetics of the A577I homodimer, implying less kinetically het-  
 168 erogeneous fluctuations (**Fig. S4**). This is further evidence in support of an overall stiffened struc-  
 169 ture of the A577I homodimer with a smoothed (less rough) energy surface, leading to relatively  
 170 streamlined conformational transitions rather than extensive random walks. Under macro-  
 171 molecular crowding, changes of the conformational dynamics are visible already from the station-  
 172 ary distributions: as shown in **Fig. 2a**, the low and high FRET populations are most separated in



173 this case. This is indicative of fast fluctuations, at or below the timescale of the sampling rate (5Hz)  
174 that are slowed down at higher viscosity. Still, transitions between open and closed conformations  
175 are regularly observed in the experiment (**Fig. S5**). For the fully resolved kinetics, the main differ-  
176 ence is observed for the rates between the closed states 2 and 3. This agrees with the increase of  
177 the closed population under macro-molecular – but not small molecular – crowding. Altogether,  
178 **Fig. 3** shows three completely different kinetic effects that underlie seemingly analogous ensemble  
179 behavior.

180 Based on the complete kinetic rate models, we can now deduce the impact on free energies along  
181 a specific spatial reaction coordinate, here the N-terminal extension (**Fig. 4**). The point mutation  
182 A577I causes an asymmetric destabilization of open conformations. Aha1 leads to simultaneous  
183 destabilization of open conformations and stabilization of closed conformations, whereas macro-  
184 molecular crowding only stabilizes closed conformations. Importantly, this information is not acces-  
185 sible from the steady-state distributions in **Fig. 2a**.

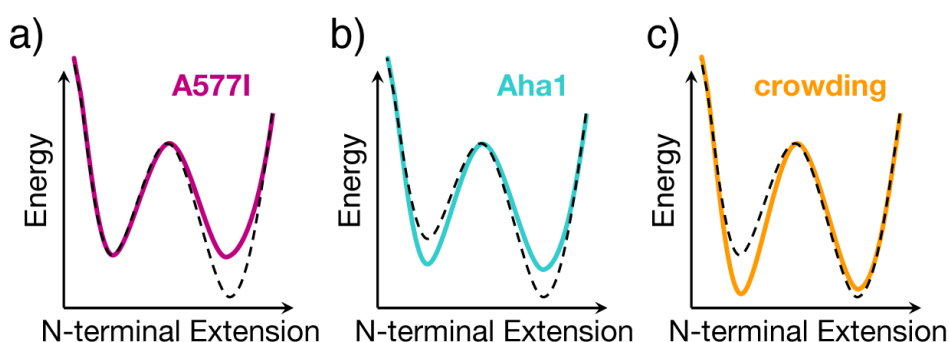

**Fig. 4: Three contrasting effects on Hsp90's conformational energy landscape.** (a) the open conformation is destabilized by the A577I mutation. (b) Aha1 inversely affects both equilibria. Whereas macro-molecular crowding (c) stabilizes the closed conformation. The dashed black line indicates the reference. This mechanistic information was obtained from all six rate models represented in **Fig. 3**, it is not accessible from **Fig. 2c** alone.

186

187

### 188 **ATPase stimulation – to varying degrees**

189 The collective shift towards closed conformations is accompanied by an overall increase in  
190 ATPase activity under all three conditions (**Fig. 5**): 7-fold for A577I, 17-fold for Aha1, 4-fold for  
191 crowding, respectively. Thus, the increase in ATP hydrolysis rate does not reflect the increase in  
192 the closed population observed in **Fig. 2c**. This is a first indication of causalities that involve more

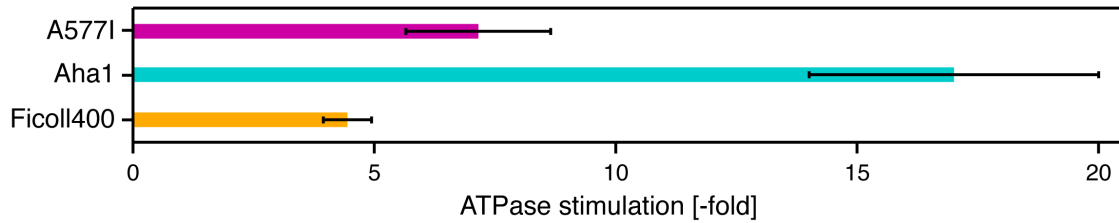

**Fig. 5: ATPase stimulation by local and global modulations:** by the point mutation A577I (34), in the presence of 3 $\mu$ M Aha1 (46), or 20wt% Ficoll400, each normalized by the activity of the wild type, without Aha1, without crowding, respectively.

193 than just the occurrence of closed conformations. In the following, we dissect the molecular origins  
194 of the increased ATPase activity. The effect of macro-molecular crowding can serve as an esti-  
195 mate of the ATPase stimulation caused exclusively by the relative stabilization of closed confor-  
196 mations, because a biochemical interaction of sucrose was excluded in control experiments (see  
197 above). Remarkably, the entirely non-specific interaction leads already to a considerable ATPase  
198 acceleration of a factor 4. This supports the wide-spread notion that the closed conformation rep-  
199 represents Hsp90's active state (45). But, in comparison to the biochemical effect of the cochaperon  
200 Aha1, the stimulation by crowding is still modest, despite the much larger closed population. Spe-  
201 cifically, the 3.7-fold increased closed population, comes with a 4-fold increased ATPase activity,  
202 whereas in the presence of Aha1 already a 1.6-fold increased closed population is accompanied  
203 by a 17-fold ATPase stimulation. The fact that Aha1 induces the smallest increase in closed popu-  
204 lation, but under the same conditions the largest ATPase stimulation, highlights the functional im-  
205 portance of *specific* contacts between Aha1 and Hsp90, which are responsible for 88% of the  
206 ATPase stimulation by Aha1.

207 In the case of the A577I mutant a 2.9-fold increased closed population comes with a 7-fold ATPase  
208 amplification. This could result from the mentioned hindrance of extremely open states indicating a  
209 conformational stiffening, restricting Hsp90's native flexibility. In other words, not only changes in  
210 the equilibrium, but also changes in the kinetics affect the ATPase activity as discussed below.

211

212

## 213 **Discussion**

214 Herein we compare three types of Hsp90 modulations, spanning a wide range from a site-specific  
215 point mutation, via cochaperon binding, to completely non-specific macro-molecular crowding. All  
216 three modulations provoke a similar steady-state behavior, namely an increase in Hsp90's closed  
217 conformation and in Hsp90's ATPase rate. But significant differences in their kinetics, which could  
218 be revealed by single-molecule FRET. This can be rationalized by the emerging picture of yeast  
219 Hsp90, as a very flexible dimer that relies critically on external assistance (e.g. by cochaperones)  
220 to control this non-productive flexibility. For example, Hsp90's ATPase function requires the con-  
221 certed action of the N-terminal nucleotide binding pocket with the ATP lid and distant elements  
222 such as the catalytic loop of the middle domain and parts of the opposite N-domain (the N-terminal  
223  $\beta$ 1- $\alpha$ 1 segment). These elements – also called *the catalytic unit* (45) - however, are very flexible,  
224 such as the entire multi-domain dimer. Consequently, anything that constrains this flexibility and  
225 confines Hsp90 in a more compact conformation, has a high potential to increase the combined  
226 probability for such a concerted action - be it by specific or even non-specific interaction.

227 **Fig. 6** shows that this can be understood as a direct result of combinatorics: in a flexible protein  
228 such as Hsp90, the catalytically active elements have many translational and rotational degrees of  
229 freedom. Thus, the probability for a certain hydrolysis-competent conformation is very small. It is  
230 however increased dramatically by conditions that constrain these degrees of freedom – even non-  
231 specifically – and localize the catalytically active elements. This notion can be further extended to  
232 cochaperone binding, and it also implies mutual effects upon client interaction. We conclude, while  
233 Hsp90's flexibility may facilitate its numerous interactions with diverse clients and cochaperones,  
234 the flexibility itself has substantial off-state character regarding the ATPase function of Hsp90.

235 A closer look at the regulation of Hsp90's conformational energy landscape by single-molecule  
 236 FRET shows the many ways to reach similar ensemble results. The point mutation A557I destabi-  
 237 lizes the open conformation, most probably by preventing access to a subset of the conformational  
 238 ensemble of open states. Macro-molecular crowding stabilizes the closed conformation by simple,  
 239 sterical confinement. The cochaperone Aha1 combines both mechanisms with additional specific  
 240 rearrangements. In theory, all three modulations can lead to the exactly same thermodynamic ob-  
 241 servation, and in fact we observe very similar steady-state distributions. Nevertheless, the kinetics  
 242 may still vary significantly – as experimentally demonstrated herein. This is an important mathe-  
 243 matical fact that holds true for all protein systems. Moreover, our findings indicate that regulation  
 244 by cochaperones - and protein-protein interactions in general - can have far-reaching thermody-  
 245 namic, kinetic, and functional consequences. Some of them can possibly be mimicked by individu-  
 246 al point mutations, but other consequences might be missed. Lastly, as shown in this work, already  
 247 non-specific, purely physical macro-molecular crowding has strong effects on thermodynamics,  
 248 kinetics and function, therefore caution is advised when relating *in vitro* findings to *in vivo* function.  
 249 As demonstrated herein, in many *in vitro* experiments macro-molecular crowding could easily be  
 250 included.

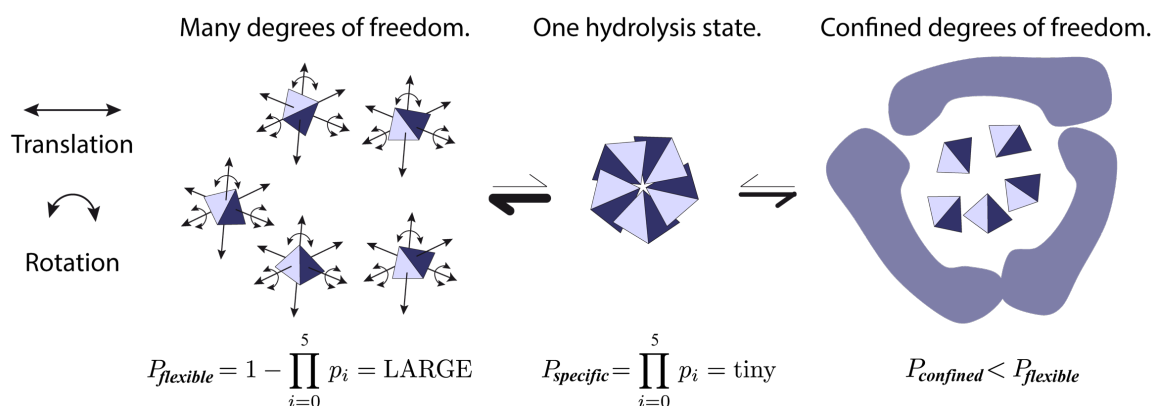

**Fig. 6: Stimulation of protein function by conformational confinement - a result of combinatorics.** In Hsp90 the hydrolysis-competent state consists of multiple flexible elements (illustrated as tetrahedrons) with many degrees of freedom (double-headed arrows), which all have to adopt a specific 3D configuration. The probability  $P_{specific}$  for all elements with  $p_i$  to be in this specific configuration is tiny (center), compared to the combined probability for all other accessible configurations (left). Any specific or non-specific confinement (right) decreases the degrees of freedom of the individual elements, thus leading to a relative stabilization of the hydrolysis-competent state. (For clarity, arrows indicating degrees of freedom were omitted on the right.)

251 In conclusion, we demonstrated herein three ways of protein regulation, ranging from site-specific  
252 localized to global modulations. All three show very similar thermodynamic observations, which  
253 are, however, caused by clearly different conformational kinetics. This is direct evidence for the  
254 importance of kinetics, and of a *dynamic* structure-function relationship in proteins. The reduction  
255 of non-productive structural flexibility stimulates Hsp90's ATPase function – even by entirely non-  
256 specific means. Our findings demonstrate that functional stimulation as a result of conformational  
257 combinatorics plays an important role in protein regulation. We anticipate that such conformational  
258 confinement - by localized *or* global modulations - is an important mechanistic concept with wide-  
259 spread implications for protein function in diverse systems.  
260

## 261 References

- 262 1. Vogel C & Marcotte EM (2012) Insights into the regulation of protein abundance from proteo-  
263 mic and transcriptomic analyses. *Nature Reviews Genetics* 13(4):227-232.
- 264 2. Hirano A, Fu Y, & Ptáček LJ (2016) The intricate dance of post-translational modifications in  
265 the rhythm of life. *Nature Structural & Molecular Biology* 23:1053 EP -.
- 266 3. Deribe YL, Pawson T, & Dikic I (2010) Post-translational modifications in signal integration.  
267 *Nature Structural & Molecular Biology* 17(6):666-672.
- 268 4. Hodge RG & Ridley AJ (2016) Regulating Rho GTPases and their regulators. *Nature Reviews*  
269 *Molecular Cell Biology* 17:496 EP -.
- 270 5. Weikum ER, Knuesel MT, Ortlund EA, & Yamamoto KR (2017) Glucocorticoid receptor control  
271 of transcription: precision and plasticity via allostery. *Nature Reviews Molecular Cell Biology*  
272 18:159 EP -.
- 273 6. Scott DE, Bayly AR, Abell C, & Skidmore J (2016) Small molecules, big targets: drug discovery  
274 faces the protein-protein interaction challenge. *Nature Reviews Drug Discovery* 15:533 EP -.
- 275 7. Danielsson J et al. (2015) Thermodynamics of protein destabilization in live cells. *Proceedings*  
276 *of the National Academy of Sciences* 112(40):12402-12407.
- 277 8. Uversky VN (2017) Intrinsically disordered proteins in overcrowded milieu: Membrane-less or-  
278 ganelles, phase separation, and intrinsic disorder. *Current Opinion in Structural Biology* 44:18 -  
279 30.
- 280 9. Levin M, Pezzulo G, & Finkelstein JM (2017) Endogenous Bioelectric Signaling Networks: Ex-  
281 ploiting Voltage Gradients for Control of Growth and Form. *Annual Review of Biomedical Engi-*  
282 *neering* 19(1):353-387.
- 283 10. Nadal E & Posas F (2015) Osmostress-induced gene expression - a model to understand how  
284 stress-activated protein kinases (SAPKs) regulate transcription. *FEBS Journal* 282(17):3275-  
285 3285.
- 286 11. Schwenkert S, Hugel T, & Cox MB (2014) The Hsp90 ensemble: coordinated Hsp90-  
287 cochaperone complexes regulate diverse cellular processes. *Nature Structural & Molecular Bi-*  
288 *ology* 21:1017 EP -.
- 289 12. Lewandowski JR, Halse ME, Blackledge M, & Emsley L (2015) Direct observation of hierar-  
290 chical protein dynamics. *Science* 348(6234):578-581.
- 291 13. Schummel PH, Haag A, Kremer W, Kalbitzer HR, & Winter R (2016) Cosolvent and Crowding  
292 Effects on the Temperature and Pressure Dependent Conformational Dynamics and Stability  
293 of Globular Actin. *The Journal of Physical Chemistry B* 120(27):6575-6586.
- 294 14. Wei G, Xi W, Nussinov R, & Ma B (2016) Protein Ensembles: How Does Nature Harness  
295 Thermodynamic Fluctuations for Life? The Diverse Functional Roles of Conformational En-  
296 sembles in the Cell. *Chemical Reviews* 116(11):6516-6551.
- 297 15. Csizmok V & Forman-Kay JD (2018) Complex regulatory mechanisms mediated by the inter-  
298 play of multiple post-translational modifications. *Current Opinion in Structural Biology* 48:58 -  
299 67.
- 300 16. Schopf FH, Biebl MM, & Buchner J (2017) The HSP90 chaperone machinery. *Nature Reviews*  
301 *Molecular Cell Biology* 18:345 EP -.
- 302 17. Stetz G, Tse A, & Verkhivker GM (2018) Dissecting Structure-Encoded Determinants of Allo-  
303 steric Cross-Talk between Post-Translational Modification Sites in the Hsp90 Chaperones.  
304 *Scientific Reports* 8(1):6899.
- 305 18. Zuehlke AD et al. (2017) An Hsp90 co-chaperone protein in yeast is functionally replaced by  
306 site-specific posttranslational modification in humans. *Nature Communications* 8(1):15328.

- 307 19. Taipale M, Jarosz DF, & Lindquist S (2010) HSP90 at the hub of protein homeostasis: emerg-  
308 ing mechanistic insights. *Nat Rev Mol Cell Biol* 11(7):515-528.
- 309 20. Lane DP (1992) p53, guardian of the genome. *Nature* 358(6381):15-16.
- 310 21. Pearl LH & Prodromou C (2006) Structure and mechanism of the Hsp90 molecular chaperone  
311 machinery. *Annual Review of Biochemistry* 75:271-294.
- 312 22. Khandelwal A, Crowley VM, & Blagg BSJ (2016) Natural Product Inspired N-Terminal Hsp90  
313 Inhibitors: From Bench to Bedside?. *Medicinal Research Reviews* 36(1):92-118.
- 314 23. Trepel J, Mollapour M, Giaccone G, & Neckers L (2010) Targeting the dynamic HSP90 com-  
315 plex in cancer. *Nat Rev Cancer* 10(8):537-549.
- 316 24. Ali M et al. (2006) Crystal structure of an Hsp90-nucleotide-p23/Sba1 closed chaperone com-  
317 plex. *Nature* 440(7087):1013-1017.
- 318 25. Verba KA et al. (2016) Atomic structure of Hsp90-Cdc37-Cdk4 reveals that Hsp90 traps and  
319 stabilizes an unfolded kinase. *Science* 352(6293):1542-1547.
- 320 26. Krukenberg KA, Foerster F, Rice LM, Sali A, & Agard DA (2008) Multiple Conformations of E.  
321 coli Hsp90 in Solution: Insights into the Conformational Dynamics of Hsp90. *Structure*  
322 16(5):755-765.
- 323 27. Hellenkamp B, Wortmann P, Kandzia F, Zacharias M, & Hugel T (2017) Multidomain structure  
324 and correlated dynamics determined by self-consistent FRET networks. *Nat Meth* 14(2):174-  
325 180.
- 326 28. Mickler M, Hessling M, Ratzke C, Buchner J, & Hugel T (2009) The large conformational  
327 changes of Hsp90 are only weakly coupled to ATP hydrolysis. *Nat Struct Mol Biol* 16(3):281-  
328 286.
- 329 29. Schmid S, Götz M, & Hugel T (2016) Single-Molecule Analysis beyond Dwell Times: Demon-  
330 stration and Assessment in and out of Equilibrium. *Biophysical Journal* 111(7):1375 - 1384.
- 331 30. Lee BL et al. (2019) The Hsp90 Chaperone: 1H and 19F Dynamic Nuclear Magnetic Reso-  
332 nance Spectroscopy Reveals a Perfect Enzyme. *Biochemistry* 58(14):1869-1877.
- 333 31. Schmid S, Götz M, & Hugel T (2018) Effects of Inhibitors on Hsp90's Conformational Dynam-  
334 ics, Cochaperone and Client Interactions. *ChemPhysChem* 19(14):1716-1721.
- 335 32. Girstmair H et al. (2019) The Hsp90 isoforms from *S. cerevisiae* differ in structure, function and  
336 client range. *Nature Communications* 10(1):3626.
- 337 33. Martinez-Ruiz A et al. (2005) S-nitrosylation of Hsp90 promotes the inhibition of its ATPase  
338 and endothelial nitric oxide synthase regulatory activities. *Proceedings of the National Acade-  
339 my of Sciences of the United States of America* 102(24):8525-8530.
- 340 34. Retzlaff M et al. (2009) Hsp90 is regulated by a switch point in the C-terminal domain. *EMBO  
341 Reports* 10(10):1147-1153.
- 342 35. Schulze A et al. (2016) Cooperation of local motions in the Hsp90 molecular chaperone  
343 ATPase mechanism. *Nature Chemical Biology* 12:628 EP -.
- 344 36. Pearl LH (2016) Review: The HSP90 molecular chaperone-an enigmatic ATPase. *Biopolymers*  
345 105(8):594-607.
- 346 37. Xu W et al. (2019) Hsp90 middle domain phosphorylation initiates a complex conformational  
347 program to recruit the ATPase-stimulating cochaperone Aha1. *Nature Communications*  
348 10(1):2574.
- 349 38. Roy R, Hohng S, & Ha T (2008) A practical guide to single-molecule FRET. *Nat Meth* 5(6):507-  
350 516.
- 351 39. Lerner E et al. (2018) Toward dynamic structural biology: Two decades of single-molecule  
352 Förster resonance energy transfer. *Science* 359(6373):.

- 353 40. Mazal H & Haran G (2019) Single-molecule FRET methods to study the dynamics of proteins  
354 at work. *Current Opinion in Biomedical Engineering* 12:8 - 17.
- 355 41. Hessling M, Richter K, & Buchner J (2009) Dissection of the ATP-induced conformational cycle  
356 of the molecular chaperone Hsp90. *Nat. Struct. Mol. Biol.* 16(3):287-293.
- 357 42. Wortmann P, Götz M, & Hugel T (2017) Cooperative Nucleotide Binding in Hsp90 and Its Reg-  
358 ulation by Aha1. *Biophysical Journal* 113(8):1711-1718.
- 359 43. Halpin JC, Huang B, Sun M, & Street TO (2016) Crowding Activates Heat Shock Protein 90.  
360 *Journal of Biological Chemistry* 291(12):6447-6455.
- 361 44. Schmid S & Hugel T (2018) Efficient use of single molecule time traces to resolve kinetic rates,  
362 models and uncertainties. *The Journal of Chemical Physics* 148(12):123312.
- 363 45. Prodromou C (2012) The `active life' of Hsp90 complexes. *Biochimica et Biophysica Acta*  
364 (*BBA*) - *Molecular Cell Research* 1823(3):614 - 623.
- 365 46. Jahn M et al. (2014) The charged linker of the molecular chaperone Hsp90 modulates domain  
366 contacts and biological function. *Proc. Natl. Acad. Sci. USA* 111(50):17881-17886.
- 367 47. Lee NK et al. (2005) Accurate FRET Measurements within Single Diffusing Biomolecules Us-  
368 ing Alternating-Laser Excitation. *Biophysical journal* 88(4):2939-2953.
- 369 48. Hellenkamp B et al. (2018) Precision and accuracy of single-molecule FRET measurements-a  
370 multi-laboratory benchmark study. *Nature Methods* 15(9):669-676.
- 371 49. Li J, Richter K, Reinstein J, & Buchner J (2013) Integration of the accelerator Aha1 in the  
372 Hsp90 co-chaperone cycle. *Nat Struct Mol Biol* 20(3):326-331.
- 373 50. Panaretou B et al. (2002) Activation of the ATPase Activity of Hsp90 by the Stress-Regulated  
374 Cochaperone Aha1. *Molecular Cell* 10(6):1307-1318.
- 375 51. Tamura JK & Gellert M (1990) Characterization of the ATP binding site on Escherichia coli  
376 DNA gyrase. Affinity labeling of Lys-103 and Lys-110 of the B subunit by pyridoxal 5'-  
377 diphospho-5'-adenosine. *Journal of Biological Chemistry* 265(34):21342-9.
- 378



## 379 **Methods**

### 380 **Protein construct preparation:**

381 Yeast Hsp90 dimers (UniProtKB: P02829) with a C-terminal coiled-coil motif (kinesin neck region  
382 of *D. melanogaster*) were used to avoid dissociation at low concentrations (28). Previously pub-  
383 lished cysteine positions (41) allowed for specific labeling with donor (61C) or acceptor (385C)  
384 fluorophores (see below). Point mutation A577I was introduced using QuikChange Lightning Site-  
385 Directed Mutagenesis Kit (Agilent Technologies). The constructs were cloned into a pET28b vector  
386 (Novagen, Merck Biosciences, Billerica, MA). They include an N-terminal His-tag followed by a  
387 SUMO-domain for later tag cleavage. The QuickChange Lightning kit (Agilent, Santa Clara, CA)  
388 was used to insert an Avitag for specific *in vivo* biotinylation at the C-terminus of the acceptor con-  
389 struct. *Escherichia coli* BL21star cells (Invitrogen, Carlsbad, CA) were cotransformed with pET28b  
390 and pBirAcm (Avidity Nanomedicines, La Jolla, CA) by electroporation (Peqlab, Erlangen, Germa-  
391 ny) and expressed according to Avidity's *in vivo* biotinylation protocol. The donor construct was  
392 expressed in *E. coli* BL21(DE3)cod+ (Stratagene, San Diego, CA) for 3 h at 37°C after induction  
393 with 1 mM isopropyl  $\beta$ -D-1-thiogalactopyranoside (IPTG) at  $OD_{600} = 0.7$  in  $LB_{Kana}$ . A cell disruptor  
394 (Constant Systems, Daventry, United Kingdom) was used for lysis in both cases. Proteins were  
395 purified as published (46) (Ni-NTA, tag cleavage, anion exchange, size exclusion chromatog-  
396 raphy). 95% purity was confirmed by SDS-PAGE. Fluorescent labels (Atto550- and Atto647N-  
397 maleimide) were purchased from Atto-tec (Siegen, Germany) and coupled to cysteins according to  
398 the supplied protocol. If not stated differently, all chemicals were purchased from Sigma Aldrich.

399

### 400 **Single-molecule FRET measurements**

401 smFRET was measured as previously detailed using a home built TIRF setup (29). Hetero-dimers  
402 (acceptor + donor) were obtained by 20 min incubation of 1  $\mu$ M donor and 0.1  $\mu$ M biotinylated ac-  
403 ceptor homodimers in measurement buffer (40 mM Hepes, 150 mM KCl, and 10 mM  $MgCl_2$ ,  
404 pH7.5) at 47°C. This favors biotinylated heterodimers to bind to the polyethylene glycol (PEG,  
405 Rapp Polymere, Tuebingen, Germany) passivated and neutravidin (Thermo Fisher Scientific, Wal-  
406 tham, MA) coated fluid chamber. Residual homodimers are recognized using alternating laser exci-  
407 tation (ALEX) of donor and acceptor dyes (47,48) and excluded from analysis. For optimal interac-

408 tion affinity with Aha1, measurements were performed in low salt buffer (40mM Hepes, 20mM KCl,  
409 5mM MgCl<sub>2</sub>, pH 7.5 with 3.5μM Aha1 and 2mM ATP). For comparison, data without Aha1 was  
410 measured accordingly. Notably, significant binding was previously found for Aha1 with labeled  
411 Hsp90-385C at much lower concentration of 0.3μM (49), which is exactly the dissociation constant  
412 reported for unlabeled Hsp90 (50). This implies that, although not directly detectable in the experi-  
413 ment, Hsp90 exists predominantly in complex with Aha1 under the used conditions. A577I/wt con-  
414 structs were created through monomer exchange (see above). They are distinguished from both  
415 kinds of homodimers through the fluorescence signal (donor+acceptor). Measurements were per-  
416 formed in measurement buffer plus 2mM ATP if not stated differently. Macro-molecular crowding  
417 was mimicked by 20wt% polymeric sucrose, known as Ficoll 400 (Sigma Aldrich) in measurement  
418 buffer if not stated differently.

419

#### 420 **Activity Assay**

421 ATPase activity was measured at 37°C coupled to NADH oxidation, which was followed as a de-  
422 crease in absorption at 340nm using an ATP regenerative assay similar to (51): 0.2mM NADH Di-  
423 Na, Roche; 2mM phosphoenol pyruvate K-salt, Bachem; 2 U/ml pyruvate kinase, Roche; 10 U/ml  
424 lactate dehydrogenase, Roche; in 40mM Hepes, 150mM KCl, 10mM MgCl<sub>2</sub>, pH 7.5).

425

426

#### 427 **Acknowledgements**

428 The cochaperone Aha1 was a kind gift of Dr. Markus Jahn. This work has been funded in part by  
429 the European Research Council through ERC grant agreement no. 681891 and the Deutsche For-  
430 schungsgemeinschaft (DFG, German Research Foundation) – Project-ID 403222702 – SFB 1381.  
431 SS acknowledges the Postdoc.Mobility fellowship no. P400PB\_180889 by the Swiss National Sci-  
432 ence Foundation.
